# Supplementary material for: Au nanoparticles doped ZrTiO4 films and hydrogen gas induced Au-plasmon shifting
Source: Royal Society of Chemistry journal article supplement (doi:10.1039/c0jm00675k), 2010-01-01
Supplement: c0jm00675k.pdf [file c0jm00675k.pdf]

## Au nanoparticles doped ZrTiO<sub>4</sub> films and hydrogen gas induced Au-plasmon shifting

Sourav Pramanik, Sudipto Pal and Goutam De\*

*Nano-Structured Materials Division, Central Glass and Ceramic Research Institute,  
Council of Scientific and Industrial Research, 196, Raja S. C. Mullick Road, Kolkata  
700032, India E-mail: gde@cgcric.res.in*

### Electronic Supplementary Information (ESI):

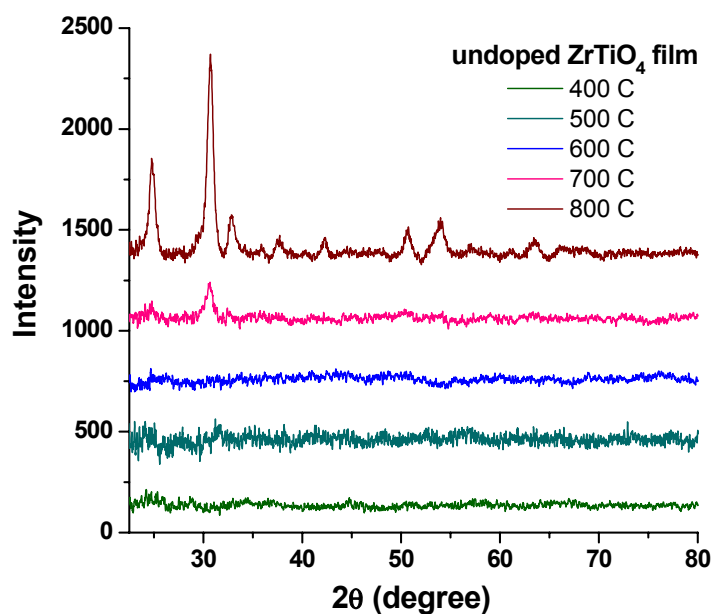

**Fig. S1** GIXRD patterns of undoped ZrTiO<sub>4</sub> films heat treated at different temperatures. The films were prepared following the identical procedures as those of Au doped films (see experimental).

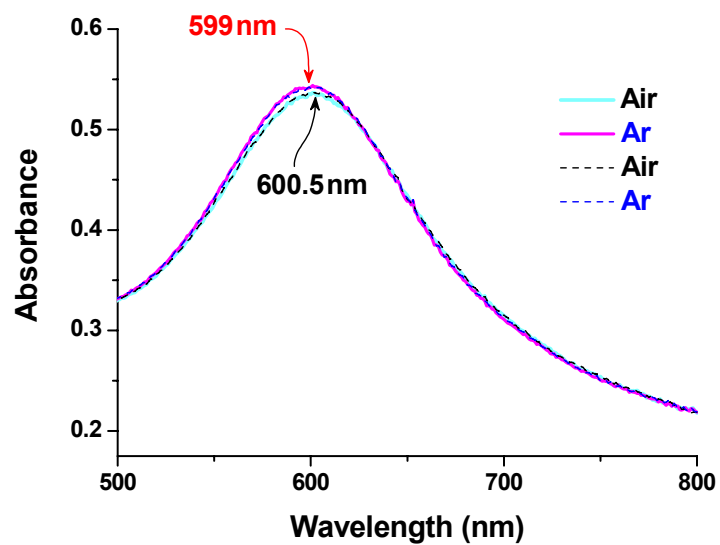

**Fig. S2** Au-SPR positions of the Au doped amorphous ZrTiO<sub>4</sub> film (annealed at 400 °C) in argon and air (two cycles each) at the operating temperature 200 °C.
